# Supplementary material
Source: HighWire-hosted journal article supplement (https://bmjopen.bmj.com/content/10/11/e041574)
Supplement: inline-supplementary-material-1 [file inline-supplementary-material-1.pdf]

## APPENDIX 1: Interview Guide

### *Prior knowledge of liver disease/views of health:*

- Before being contacted about the liver tests, how would you describe your health?
- Can you tell me what you knew about the risks of excessive alcohol consumption/diabetes? (probe to ask about liver disease if not mentioned by participant)
- Ask about patient's own risk – alcohol consumption/diabetes control pre-scan?
- Had you intended to make any attempts to improve your lifestyle/health prior to the liver tests? (probe to ask why/why no prior attempts). If so, what did you do? What triggered the previous lifestyle changes?
- Who contacted you about having tests to check your liver function?
- What information did you receive about the scan before having it?
- Did you understand why you were contacted to have the scan done?
- How did you feel about being contacted?

### *Scan experience and results:*

- When did you have the liver scan done?
- Please take me through what you remember about having the liver scan done?
- How would you describe your feelings about having this test done?
- Did you understand what the scan was looking for?
- Can you tell me about your results from the liver scan? Probe around who discussed the results and were they explained clearly?
- Have you remembered the number result (liver stiffness) that the scan produced? If so, did this result mean anything to you?
- How did the scan results make you feel at the time?

### *Current Health Beliefs:*

- Did having the liver tests have an impact on how you view your health?
- Since having the tests, is there anything you have learned about liver disease?
- To what extent have your health beliefs changed since having the liver scan?
- To what extent has information from the doctors or nurses had a role in changing how you view your health?
- Has the scan prompted you to make lifestyle changes?
